# Supplementary material for: Detecting the Influence of Initial Pioneers on Succession at Deep-Sea Vents
Source: PubMed Central journal article supplement (PMC3514232; doi:10.1371/journal.pone.0050015), 2012-12-04
Supplement: pone.0050015.s002.pdf [file pone.0050015.s002.pdf]

| Dive | Scan | Cruise    | Site   | Exp  | Temperature °C |      |      |        | pH  |     |      |        | H <sub>2</sub> S μM |     |      |        |
|------|------|-----------|--------|------|----------------|------|------|--------|-----|-----|------|--------|---------------------|-----|------|--------|
|      |      |           |        |      | Med            | Max  | Mean | St Dev | Med | Min | Mean | St Dev | Med                 | Max | Mean | St Dev |
| 4288 | 1    | Dec. 2006 | P-Vent | Cool | 3.3            | 3.9  | 3.4  | 0.2    | 7.4 | 7.2 | 7.4  | 0.1    | 3                   | 9   | 3    | 2      |
|      | 2    |           |        |      | 3.2            | 4.1  | 3.5  | 0.3    | 7.8 | 7.6 | 7.8  | 0.1    | 2                   | 4   | 2    | 1      |
|      | 3    |           |        |      | 2.5            | 3.1  | 2.6  | 0.2    | 8.0 | 7.8 | 7.9  | 0.1    | 0                   | 1   | 0    | 0      |
|      | 4    |           | P-Vent | Hot  | 28.4           | 29.3 | 28.6 | 0.4    | 5.9 | 5.9 | 5.9  | 0.04   | 474                 | 619 | 473  | 54     |
|      | 5    |           |        |      | 12.4           | 15.4 | 13.5 | 1.4    | 6.5 | 6.3 | 6.5  | 0.2    | 91                  | 176 | 96   | 43     |
|      | 6    |           |        |      | 27.5           | 29.8 | 28.3 | 1.1    | 6.0 | 5.9 | 5.9  | 0.04   | 411                 | 564 | 430  | 60     |
| 4292 | 25   | Dec. 2006 | P-Vent | Hot  | 10.8           | 16.8 | 11.7 | 2.7    | 6.7 | 6.5 | 6.7  | 0.2    | 103                 | 183 | 104  | 45     |
|      | 26   |           |        |      | 15.3           | 22.0 | 17.0 | 3.7    | 6.3 | 6.1 | 6.4  | 0.2    | 158                 | 319 | 170  | 97     |
|      | 27   |           |        |      | 14.9           | 21.5 | 16.1 | 2.2    | 6.4 | 6.2 | 6.4  | 0.1    | 140                 | 209 | 141  | 31     |
| 4293 | 1    | Dec. 2006 | V-Vent | Hot  | 13.2           | 17.3 | 13.9 | 1.9    | 6.8 | 6.7 | 6.9  | 0.1    | 197                 | 462 | 216  | 104    |
|      | 2    |           |        |      | 5.4            | 8.8  | 6.2  | 1.2    | 7.3 | 6.9 | 7.3  | 0.2    | 50                  | 184 | 54   | 36     |
|      | 3    |           |        |      | 15.9           | 19.8 | 17.1 | 1.9    | 6.8 | 6.6 | 6.8  | 0.2    | 209                 | 300 | 189  | 79     |
|      | 4    |           |        |      | 10.3           | 16.0 | 11.2 | 1.6    | 6.9 | 6.7 | 7.0  | 0.2    | 121                 | 248 | 124  | 61     |
|      | 5    |           |        |      | 4.3            | 7.0  | 4.8  | 0.9    | 7.4 | 7.2 | 7.4  | 0.1    | 20                  | 50  | 23   | 11     |
|      | 6    |           |        |      | 7.5            | 9.5  | 8.2  | 1.0    | 7.1 | 6.9 | 7.2  | 0.2    | 76                  | 149 | 75   | 43     |
| 4293 | 7    | Dec. 2006 | V-vent | Warm | 2.6            | 3.4  | 2.7  | 0.2    | 7.8 | 7.7 | 7.8  | 0.03   | 3                   | 5   | 3    | 1      |
|      | 8    |           |        |      | 2.7            | 3.4  | 2.9  | 0.3    | 7.8 | 7.7 | 7.8  | 0.04   | 4                   | 8   | 4    | 2      |
|      | 9    |           |        |      | 2.7            | 3.5  | 2.9  | 0.3    | 7.8 | 7.7 | 7.8  | 0.05   | 4                   | 9   | 5    | 2      |
|      | 10   |           |        |      | 2.5            | 3.4  | 2.8  | 0.3    | 7.8 | 7.6 | 7.7  | 0.1    | 0                   | 1   | 0    | 0      |
|      | 11   |           |        |      | 6.3            | 7.5  | 6.7  | 0.8    | 7.3 | 7.2 | 7.3  | 0.1    | 16                  | 36  | 18   | 10     |
|      | 12   |           |        |      | 2.8            | 3.8  | 3.1  | 0.4    | 7.7 | 7.5 | 7.7  | 0.1    | 1                   | 5   | 2    | 1      |
| 4293 | 13   | Dec. 2006 | V-vent | Cool | 1.9            | 2.1  | 1.9  | 1.9    | 7.9 | 7.9 | 7.9  | 0.00   | 0                   | 0   | 0    | 0      |
|      | 14   |           |        |      | 1.9            | 2.1  | 1.9  | 1.9    | 7.9 | 7.9 | 7.9  | 0.01   | 0                   | 0   | 0    | 0      |
| 4394 | 7    | Jan. 2008 | P-Vent | Hot  | 2.4            | 2.9  | 2.5  | 0.2    | 7.7 | 7.6 | 7.7  | 0.0    | 0                   | 0   | 0    | 0      |
|      | 8    |           |        |      | 2.5            | 4.2  | 3.0  | 0.6    | 7.6 | 7.3 | 7.6  | 0.1    | 0                   | 0   | 0    | 0      |
|      | 9    |           |        |      | 11.1           | 13.8 | 12.2 | 1.3    | 6.2 | 6.1 | 6.3  | 0.1    | 1                   | 21  | 8    | 9      |
| 4398 | 6    | Jan. 2008 | P-Vent | Hot  | 12.0           | 14.0 | 12.7 | 0.9    | 6.3 | 6.2 | 6.3  | 0.2    | 25                  | 30  | 24   | 5      |
|      | 7    |           |        |      | 9.1            | 11.9 | 9.9  | 1.2    | 6.4 | 6.2 | 6.4  | 0.2    | 27                  | 58  | 27   | 17     |
|      | 8    |           |        |      | 6.4            | 12.2 | 7.9  | 2.1    | 6.2 | 6.1 | 6.3  | 0.2    | 72                  | 115 | 63   | 35     |
