# Supplementary material for: Detecting the Influence of Initial Pioneers on Succession at Deep-Sea Vents
Source: PubMed Central journal article supplement (PMC3514232; doi:10.1371/journal.pone.0050015), 2012-12-04
Supplement: pone.0050015.s004.pdf [file pone.0050015.s004.pdf]

| Source                             | SS            | df       | MS            | F            | P            | Tukey             |
|------------------------------------|---------------|----------|---------------|--------------|--------------|-------------------|
| <i>Ctenopelta porifera</i>         | 0.0616        | 2        | 0.0308        | 1.50         | 0.295        |                   |
| Error                              | 0.1228        | 6        | 0.0205        |              |              |                   |
| <i>Cyathermia naticoides</i>       | 0.2926        | 2        | 0.1463        | 2.58         | 0.155        |                   |
| Error                              | 0.3399        | 6        | 0.0566        |              |              |                   |
| <i>Lepetodrilus tevnianus</i>      | 0.2111        | 2        | 0.1056        | 1.15         | 0.378        |                   |
| Error                              | 0.5513        | 6        | 0.0919        |              |              |                   |
| <i>Paralvinella grasslei</i>       | 0.4680        | 2        | 0.2340        | 5.60         | 0.043        | 11>22             |
| Error                              | 0.2509        | 6        | 0.0418        |              |              |                   |
| <b><i>Tevnia jerichonana</i></b>   | <b>0.9636</b> | <b>2</b> | <b>0.4818</b> | <b>32.68</b> | <b>0.001</b> | <b>9&gt;22=11</b> |
| Error                              | 0.0885        | 6        | 0.0147        |              |              |                   |
| <i>Bythograea thermydron</i>       | 0.0205        | 2        | 0.0102        | 5.02         | 0.052        |                   |
| Error                              | 0.0122        | 6        | 0.0020        |              |              |                   |
| <i>Lepetodrilus elevatus</i>       | 0.2046        | 2        | 0.1023        | 7.57         | 0.023        | 22>9=11           |
| Error                              | 0.0810        | 6        | 0.0135        |              |              |                   |
| <i>Rhynchopelta contentrica</i>    | 0.0011        | 2        | 0.0006        | 3.97         | 0.080        |                   |
| Error                              | 0.0008        | 6        | 0.0001        |              |              |                   |
| <i>Bathymodiolus thermophilus</i>  | 0.0009        | 2        | 0.0005        | 2.69         | 0.146        |                   |
| Error                              | 0.0010        | 6        | 0.0002        |              |              |                   |
| <i>Amphisamytha galapagensis</i>   | 0.0019        | 2        | 0.0010        | 2.54         | 0.159        |                   |
| Error                              | 0.0023        | 6        | 0.0004        |              |              |                   |
| <b><i>Ophryotroch akessoni</i></b> | <b>0.0990</b> | <b>2</b> | <b>0.0495</b> | <b>30.64</b> | <b>0.001</b> | <b>22&gt;9=11</b> |
| Error                              | 0.0097        | 6        | 0.0016        |              |              |                   |
| <i>Riftia pachyptila</i>           | 0.0003        | 2        | 0.0002        | 1.00         | 0.422        |                   |
| Error                              | 0.0009        | 6        | 0.0002        |              |              |                   |
