# Supplementary material for: Detecting the Influence of Initial Pioneers on Succession at Deep-Sea Vents
Source: PubMed Central journal article supplement (PMC3514232; doi:10.1371/journal.pone.0050015), 2012-12-04
Supplement: pone.0050015.s005.pdf [file pone.0050015.s005.pdf]

| Source                               | SS            | df       | MS            | F           | P             | Tukey                  |
|--------------------------------------|---------------|----------|---------------|-------------|---------------|------------------------|
| <i>Ctenopelta porifera</i>           | 0.0001        | 2        | 0.0000        | 1.93        | 0.195         |                        |
| Error                                | 0.0002        | 10       | 0.0000        |             |               |                        |
| <i>Cyathernia naticoides</i>         | 0.0722        | 2        | 0.0361        | 3.83        | 0.058         |                        |
| Error                                | 0.0942        | 10       | 0.0094        |             |               |                        |
| <b><i>Lepetodrilus tevnianus</i></b> | <b>0.0227</b> | <b>2</b> | <b>0.0114</b> | <b>7.71</b> | <b>0.009*</b> | <b>P=V&gt;pre</b>      |
| Error                                | 0.0147        | 10       | 0.0015        |             |               |                        |
| <i>Paralvinella grasslei</i>         | 0.0118        | 2        | 0.0059        | 2.54        | 0.128         |                        |
| Error                                | 0.0232        | 10       | 0.0023        |             |               |                        |
| <i>Tevnia jerichonana</i>            | 0.0045        | 2        | 0.0022        | 2.46        | 0.136         |                        |
| Error                                | 0.0091        | 10       | 0.0009        |             |               |                        |
| <b><i>Bythograea therydron</i></b>   | <b>0.0000</b> | <b>2</b> | <b>0.0000</b> | <b>9.65</b> | <b>0.005</b>  | <b>V &gt; P&gt;pre</b> |
| Error                                | 0.0000        | 10       | 0.0000        |             |               |                        |
| <i>Lepetodrilus elevatus</i>         | 0.2304        | 2        | 0.1152        | 3.67        | 0.064         |                        |
| Error                                | 0.3141        | 10       | 0.0314        |             |               |                        |
| <i>Amphisamytha galapagensis</i>     | 0.0316        | 2        | 0.0158        | 5.19        | 0.028         | Pre>V=P                |
| Error                                | 0.0304        | 10       | 0.0030        |             |               |                        |
| <i>Ophryotrocha akessoni</i>         | 0.0008        | 2        | 0.0004        | 0.88        | 0.443         |                        |
| Error                                | 0.0046        | 10       | 0.0005        |             |               |                        |
| <i>Lepetodrilus pustulosus</i>       | 0.006         | 2        | 0.0030        | 1.89        | 0.202         |                        |
| Error                                | 0.016         | 10       | 0.0016        |             |               |                        |
| <i>Bathymodiolus thermophilus</i>    | 0.0002        | 2        | 0.0001        | 2.17        | 0.164         |                        |
| Error                                | 0.0006        | 10       | 0.0001        |             |               |                        |
| <i>Riftia pachyptila</i>             | 0.0000        | 2        | 0.0000        | 0.93        | 0.426         |                        |
| Error                                | 0.0003        | 10       | 0.0000        |             |               |                        |
