# Supplementary material for: Detecting the Influence of Initial Pioneers on Succession at Deep-Sea Vents
Source: PubMed Central journal article supplement (PMC3514232; doi:10.1371/journal.pone.0050015), 2012-12-04
Supplement: pone.0050015.s006.pdf [file pone.0050015.s006.pdf]

| Source                                  | SS            | df       | MS            | F            | P                | Tukey           |
|-----------------------------------------|---------------|----------|---------------|--------------|------------------|-----------------|
| <i>Ctenopelta porifera</i>              | 8.648         | 2        | 4.324         | 3.86         | 0.084            |                 |
| Error                                   | 6.726         | 6        | 1.121         |              |                  |                 |
| <i>Cyathernia naticoides</i>            | 1.854         | 2        | 0.927         | 2.12         | 0.201            |                 |
| Error                                   | 2.624         | 6        | 0.437         |              |                  |                 |
| <i>Lepetodrilus tevnianus</i>           | 26.716        | 2        | 13.358        | 5.41         | 0.045            | W>H             |
| Error                                   | 14.821        | 6        | 2.470         |              |                  |                 |
| <b><i>Paralvinella grasslei</i></b>     | <b>31.248</b> | <b>2</b> | <b>15.624</b> | <b>43.44</b> | <b>&lt;0.001</b> | <b>H&gt;W=C</b> |
| Error                                   | <b>2.158</b>  | <b>6</b> | <b>0.360</b>  |              |                  |                 |
| *Siboglinid tubeworms, small            | 10.003        | 2        | 5.001         | 3.44         | 0.101            |                 |
| Error                                   | 8.723         | 6        | 1.454         |              |                  |                 |
| <b><i>Bythograea therydron</i></b>      | <b>2.065</b>  | <b>2</b> | <b>1.032</b>  | <b>11.66</b> | <b>0.009</b>     | <b>H=W&gt;C</b> |
| Error                                   | <b>0.531</b>  | <b>6</b> | <b>0.089</b>  |              |                  |                 |
| <b><i>Amphisamytha galapagensis</i></b> | <b>10.037</b> | <b>2</b> | <b>5.019</b>  | <b>18.30</b> | <b>0.003</b>     | <b>W&gt;C=H</b> |
| Error                                   | <b>1.645</b>  | <b>6</b> | <b>0.274</b>  |              |                  |                 |
| <b><i>Ophryotrocha akessoni</i></b>     | <b>18.123</b> | <b>2</b> | <b>9.062</b>  | <b>64.81</b> | <b>&lt;0.001</b> | <b>C=W&gt;H</b> |
| Error                                   | <b>0.839</b>  | <b>6</b> | <b>0.140</b>  |              |                  |                 |
| <i>Bathymodiolus thermophilus</i>       | 0.107         | 2        | 0.053         | 0.50         | 0.630            |                 |
| Error                                   | 0.641         | 6        | 0.093         |              |                  |                 |
| <b><i>Lepetodrilus pustulosus</i></b>   | <b>4.713</b>  | <b>2</b> | <b>2.356</b>  | <b>10.85</b> | <b>0.010</b>     | <b>W&gt;H=C</b> |
| Error                                   | <b>1.303</b>  | <b>6</b> | <b>0.217</b>  |              |                  |                 |
| <b>Polynoid</b>                         | <b>6.193</b>  | <b>2</b> | <b>3.097</b>  | <b>11.80</b> | <b>0.008</b>     | <b>C&gt;H</b>   |
| Error                                   | <b>1.574</b>  | <b>6</b> | <b>0.262</b>  |              |                  |                 |
