# Supplementary material for: Detecting the Influence of Initial Pioneers on Succession at Deep-Sea Vents
Source: PubMed Central journal article supplement (PMC3514232; doi:10.1371/journal.pone.0050015), 2012-12-04
Supplement: pone.0050015.s007.pdf [file pone.0050015.s007.pdf]

| Source                                  | SS             | df       | MS             | F             | P                | Tukey         |
|-----------------------------------------|----------------|----------|----------------|---------------|------------------|---------------|
| <b><i>Ctenopelta porifera</i></b>       | <b>16.548</b>  | <b>1</b> | <b>16.548</b>  | <b>49.14</b>  | <b>0.002</b>     | <b>H&gt;W</b> |
| Error                                   | 1.347          | 4        | 0.337          |               |                  |               |
| <i>Cyathernia naticoides</i>            | 2.701          | 1        | 2.701          | 7.90          | 0.048            |               |
| Error                                   | 1.367          | 4        | 0.342          |               |                  |               |
| <b><i>Lepetodrilus tevnianus</i></b>    | <b>97.759</b>  | <b>1</b> | <b>97.759</b>  | <b>60.83</b>  | <b>0.001</b>     | <b>W&gt;H</b> |
| Error                                   | 6.429          | 4        | 1.607          |               |                  |               |
| <b><i>Paralvinella grasslei</i></b>     | <b>44.783</b>  | <b>1</b> | <b>44.783</b>  | <b>81.26</b>  | <b>0.001</b>     | <b>H&gt;W</b> |
| Error                                   | 2.204          | 4        | 0.551          |               |                  |               |
| <b>*Siboglinid tubeworms (small)</b>    | <b>225.809</b> | <b>1</b> | <b>225.809</b> | <b>298.43</b> | <b>&lt;0.001</b> | <b>H&gt;W</b> |
| Error                                   | 3.027          | 4        | 0.757          |               |                  |               |
| <b><i>Bythograea therydron</i></b>      | <b>3.472</b>   | <b>1</b> | <b>3.472</b>   | <b>36.99</b>  | <b>0.004</b>     | <b>H&gt;W</b> |
| Error                                   | 0.375          | 4        | 0.094          |               |                  |               |
| <b><i>Amphisamytha galapagensis</i></b> | <b>16.527</b>  | <b>1</b> | <b>16.527</b>  | <b>22.91</b>  | <b>0.009</b>     | <b>W&gt;H</b> |
| Error                                   | 2.885          | 4        | 0.721          |               |                  |               |
| <b><i>Ophryotroch akessoni</i></b>      | <b>23.205</b>  | <b>1</b> | <b>23.205</b>  | <b>191.54</b> | <b>&lt;0.001</b> | <b>W&gt;H</b> |
| Error                                   | 0.485          | 4        | 0.121          |               |                  |               |
| <i>Bathymodiolus thermophilus</i>       | 0.320          | 1        | 0.320          | 4.00          | 0.116            |               |
| Error                                   | 0.320          | 4        | 0.080          |               |                  |               |
| <i>Clypeosectus delectus</i>            | 0.432          | 1        | 0.432          | 1.00          | 0.374            |               |
| Error                                   | 1.727          | 4        | 0.432          |               |                  |               |
| Polynoid                                | 0.884          | 1        | 0.884          | 2.71          | 0.175            |               |
| Error                                   | 1.303          | 4        | 0.326          |               |                  |               |
