# Supplementary material for: Detecting the Influence of Initial Pioneers on Succession at Deep-Sea Vents
Source: PLoS One. 2012 Dec 4;7(12):e50015. doi: 10.1371/journal.pone.0050015 (PMC3514232; doi:10.1371/journal.pone.0050015)
Supplement: Table S2 — Abundance of species (taxa) on individual colonization sandwiches and blocks. Sandwiches were recovered from hot, warm or cool habitat after the eruption (9, 11 or 22 months) at P-vent, Ty/Io, and V-vent. Blocks were recovered from hot habitat before the eruption (Pre) at Biovent and Worm Hole. Temperature (maximum on recovery) measured at surfaces with Alvin probe. (PDF) [file pone.0050015.s003.pdf]

| Treatment                  | 9 mo, P vent, Hot |      |      | 9 mo, Ty/Io, Warm |      |      | 11 mo, P vent, Hot |     |     | 11 mo, P vent, Warm |     |     | 11 mo, P vent, Cool |     |     | 22 mo, P vent, Hot |      |      | 22 mo, V vent, Hot |      |     | Pre, Biovent, Hot |     |     |     | Pre, WH, Hot |     |
|----------------------------|-------------------|------|------|-------------------|------|------|--------------------|-----|-----|---------------------|-----|-----|---------------------|-----|-----|--------------------|------|------|--------------------|------|-----|-------------------|-----|-----|-----|--------------|-----|
| Temp (°C)                  | 26.7              | 23.2 | 24.7 | 2.2               | 2.2  | 6.5  | 18.5               | 27  | 28  | 9.6                 | 7   | 9   | 3.3                 | 3.3 | 3.7 | 10                 | 17.9 | 14.7 | 9.3                | 16.8 | 8.8 | 4.6               | 5.5 | 9.8 | 4.6 | 7.3          | 4.7 |
| Taxon                      |                   |      |      |                   |      |      |                    |     |     |                     |     |     |                     |     |     |                    |      |      |                    |      |     |                   |     |     |     |              |     |
| Bathymargarites symplector | 0                 | 0    | 0    | 0                 | 0    | 0    | 0                  | 0   | 0   | 0                   | 0   | 0   | 0                   | 0   | 0   | 0                  | 0    | 0    | 0                  | 0    | 0   | 0                 | 0   | 0   | 0   | 0            | 1   |
| Clypeosectus delectus      | 0                 | 0    | 0    | 4                 | 0    | 0    | 0                  | 0   | 0   | 0                   | 0   | 0   | 3                   | 6   | 1   | 0                  | 0    | 0    | 0                  | 0    | 0   | 0                 | 0   | 0   | 0   | 0            | 1   |
| Ctenopelta porifera        | 20                | 10   | 45   | 0                 | 0    | 1    | 0                  | 31  | 15  | 0                   | 0   | 0   | 0                   | 0   | 0   | 0                  | 2    | 14   | 0                  | 3    | 0   | 0                 | 0   | 0   | 0   | 0            | 0   |
| Cyathermia naticoides      | 1                 | 1    | 6    | 0                 | 0    | 1    | 0                  | 6   | 3   | 0                   | 0   | 0   | 2                   | 0   | 1   | 0                  | 973  | 390  | 121                | 0    | 0   | 5                 | 9   | 139 | 27  | 25           | 2   |
| Eulepetopsis vitrea        | 0                 | 0    | 0    | 2                 | 0    | 0    | 0                  | 0   | 0   | 0                   | 0   | 0   | 0                   | 0   | 1   | 0                  | 0    | 0    | 0                  | 0    | 0   | 0                 | 0   | 0   | 0   | 0            | 0   |
| Gorgoleptis spiralis       | 0                 | 0    | 0    | 2                 | 1    | 0    | 0                  | 0   | 0   | 0                   | 0   | 0   | 1                   | 4   | 3   | 0                  | 0    | 0    | 0                  | 0    | 0   | 3                 | 0   | 0   | 0   | 0            | 0   |
| Gorgoleptis emarginatus    | 0                 | 0    | 0    | 0                 | 0    | 0    | 0                  | 0   | 0   | 1                   | 0   | 2   | 0                   | 0   | 0   | 0                  | 0    | 0    | 0                  | 0    | 0   | 0                 | 0   | 0   | 0   | 0            | 0   |
| Lepetodrilus cristatus     | 0                 | 0    | 0    | 0                 | 0    | 0    | 0                  | 0   | 0   | 0                   | 0   | 0   | 0                   | 0   | 0   | 0                  | 0    | 0    | 0                  | 0    | 14  | 2                 | 0   | 11  | 0   | 0            | 0   |
| Lepetodrilus elevatus      | 0                 | 0    | 0    | 0                 | 0    | 2    | 0                  | 0   | 0   | 2                   | 0   | 0   | 0                   | 0   | 0   | 287                | 422  | 7    | 24                 | 41   | 9   | 60                | 42  | 479 | 254 | 1949         | 683 |
| Lepetodrilus ovalis        | 0                 | 0    | 0    | 0                 | 0    | 0    | 0                  | 0   | 0   | 0                   | 1   | 2   | 0                   | 0   | 0   | 1                  | 0    | 0    | 0                  | 0    | 1   | 1                 | 0   | 0   | 0   | 1            | 1   |
| Lepetodrilus pustulosus    | 0                 | 0    | 0    | 0                 | 0    | 0    | 0                  | 0   | 0   | 9                   | 4   | 1   | 0                   | 0   | 0   | 1                  | 0    | 0    | 0                  | 0    | 0   | 1                 | 10  | 13  | 32  | 45           | 48  |
| Lepetodrilus tevnianus     | 1                 | 0    | 21   | 378               | 1268 | 1557 | 52                 | 0   | 19  | 466                 | 928 | 769 | 18                  | 56  | 566 | 433                | 278  | 8    | 62                 | 125  | 73  | 0                 | 0   | 0   | 0   | 0            | 0   |
| Lepetodrilus spp.          | 0                 | 0    | 1    | 1738              | 633  | 1056 | 0                  | 0   | 0   | 282                 | 428 | 291 | 268                 | 465 | 527 | 196                | 101  | 1    | 17                 | 0    | 13  | 0                 | 0   | 0   | 0   | 0            | 0   |
| Pachydermia laevis         | 0                 | 0    | 0    | 2                 | 0    | 0    | 0                  | 0   | 0   | 0                   | 0   | 0   | 0                   | 0   | 0   | 0                  | 0    | 0    | 0                  | 0    | 0   | 0                 | 0   | 0   | 0   | 0            | 0   |
| Planorbidella planispira   | 0                 | 0    | 0    | 1                 | 0    | 0    | 0                  | 0   | 0   | 0                   | 0   | 0   | 0                   | 0   | 0   | 0                  | 0    | 0    | 0                  | 0    | 0   | 0                 | 0   | 0   | 0   | 0            | 0   |
| Rhynchopelta concentrica   | 0                 | 0    | 0    | 0                 | 1    | 0    | 0                  | 0   | 0   | 0                   | 0   | 0   | 0                   | 0   | 0   | 2                  | 3    | 0    | 0                  | 0    | 0   | 0                 | 0   | 2   | 1   | 0            | 0   |
| Sutilizona theca           | 0                 | 0    | 0    | 9                 | 0    | 0    | 0                  | 0   | 0   | 0                   | 0   | 0   | 1                   | 5   | 0   | 0                  | 0    | 0    | 0                  | 0    | 0   | 0                 | 0   | 0   | 0   | 0            | 0   |
| gastropods, unk            | 0                 | 0    | 0    | 0                 | 0    | 0    | 0                  | 0   | 0   | 2                   | 4   | 0   | 0                   | 0   | 0   | 0                  | 0    | 0    | 0                  | 0    | 0   | 48                | 1   | 8   | 11  | 0            | 10  |
| Bathymodiolus thermophilus | 0                 | 0    | 0    | 1                 | 0    | 1    | 0                  | 0   | 0   | 0                   | 0   | 1   | 0                   | 0   | 1   | 3                  | 1    | 0    | 2                  | 0    | 1   | 2                 | 0   | 25  | 11  | 0            | 13  |
| aplacophoran               | 0                 | 0    | 0    | 0                 | 0    | 0    | 0                  | 0   | 0   | 0                   | 0   | 0   | 0                   | 0   | 0   | 0                  | 0    | 0    | 0                  | 0    | 0   | 0                 | 0   | 1   | 0   | 1            | 0   |
| Alvinella sp.              | 0                 | 1    | 0    | 0                 | 0    | 0    | 0                  | 0   | 0   | 0                   | 0   | 0   | 0                   | 0   | 0   | 0                  | 0    | 0    | 0                  | 0    | 0   | 0                 | 0   | 0   | 0   | 0            | 0   |
| Amphisamytha galapagensis  | 0                 | 0    | 0    | 87                | 29   | 7    | 0                  | 0   | 0   | 20                  | 5   | 14  | 2                   | 0   | 2   | 1                  | 12   | 0    | 2                  | 1    | 0   | 85                | 82  | 172 | 39  | 8            | 47  |
| Archinome rosacea          | 0                 | 0    | 0    | 0                 | 0    | 0    | 0                  | 0   | 0   | 0                   | 0   | 1   | 0                   | 0   | 0   | 0                  | 0    | 0    | 0                  | 0    | 0   | 0                 | 0   | 0   | 0   | 0            | 0   |
| Branchinotogluma sp.       | 0                 | 0    | 0    | 0                 | 0    | 0    | 0                  | 0   | 0   | 0                   | 0   | 0   | 0                   | 0   | 0   | 1                  | 2    | 0    | 0                  | 0    | 3   | 0                 | 0   | 0   | 0   | 0            | 0   |
| Branchiiplicatus cupreus   | 0                 | 0    | 0    | 0                 | 0    | 0    | 0                  | 0   | 0   | 0                   | 0   | 0   | 0                   | 0   | 0   | 0                  | 5    | 0    | 2                  | 1    | 1   | 0                 | 0   | 0   | 0   | 0            | 0   |
| Branchipolynoe sp.         | 0                 | 0    | 0    | 0                 | 0    | 0    | 0                  | 0   | 0   | 0                   | 0   | 0   | 0                   | 0   | 0   | 0                  | 0    | 0    | 0                  | 0    | 0   | 0                 | 0   | 0   | 0   | 0            | 1   |
| Galapagomystides aristata  | 0                 | 0    | 0    | 0                 | 0    | 0    | 0                  | 0   | 0   | 0                   | 3   | 0   | 0                   | 0   | 2   | 0                  | 0    | 0    | 0                  | 0    | 0   | 2                 | 0   | 14  | 10  | 0            | 0   |
| Glycera sp                 | 0                 | 0    | 0    | 0                 | 0    | 0    | 0                  | 0   | 0   | 0                   | 0   | 0   | 0                   | 0   | 1   | 0                  | 0    | 0    | 0                  | 0    | 0   | 0                 | 0   | 0   | 0   | 0            | 0   |
| Hesiospina vestimentifera  | 0                 | 0    | 0    | 0                 | 0    | 0    | 0                  | 0   | 0   | 0                   | 0   | 0   | 0                   | 0   | 0   | 1                  | 0    | 0    | 0                  | 0    | 0   | 0                 | 0   | 0   | 0   | 0            | 0   |
| hesionid                   | 0                 | 0    | 0    | 0                 | 0    | 0    | 0                  | 0   | 0   | 0                   | 0   | 0   | 3                   | 0   | 7   | 0                  | 0    | 0    | 0                  | 0    | 0   | 0                 | 0   | 0   | 0   | 0            | 0   |
| Laminatubus alvini         | 0                 | 0    | 0    | 0                 | 0    | 0    | 0                  | 0   | 0   | 0                   | 0   | 0   | 0                   | 0   | 0   | 0                  | 0    | 0    | 0                  | 0    | 0   | 0                 | 0   | 9   | 0   | 0            | 1   |
| Lepidonotopodium sp.       | 0                 | 0    | 0    | 0                 | 0    | 0    | 0                  | 0   | 2   | 0                   | 0   | 0   | 0                   | 0   | 0   | 0                  | 0    | 0    | 0                  | 0    | 1   | 0                 | 0   | 0   | 0   | 1            | 0   |
| Nereis sp.                 | 0                 | 0    | 0    | 0                 | 0    | 0    | 0                  | 0   | 0   | 0                   | 0   | 0   | 0                   | 0   | 0   | 0                  | 0    | 0    | 0                  | 0    | 0   | 1                 | 0   | 0   | 0   | 0            | 0   |
| Opfryotrocha akessoni      | 0                 | 0    | 0    | 39                | 36   | 89   | 0                  | 0   | 0   | 27                  | 14  | 17  | 10                  | 26  | 30  | 68                 | 224  | 21   | 52                 | 12   | 34  | 19                | 16  | 18  | 18  | 6            | 10  |
| Paralvinella grasslei      | 158               | 121  | 112  | 0                 | 0    | 5    | 23                 | 109 | 106 | 0                   | 0   | 1   | 0                   | 0   | 1   | 7                  | 138  | 193  | 2                  | 47   | 0   | 1                 | 0   | 50  | 0   | 0            | 0   |
| polynoids, unk             | 0                 | 0    | 0    | 1                 | 4    | 0    | 1                  | 0   | 0   | 5                   | 2   | 2   | 6                   | 5   | 20  | 0                  | 0    | 0    | 1                  | 0    | 0   | 0                 | 1   | 1   | 0   | 0            | 0   |
| Prionospio sandersi        | 0                 | 0    | 0    | 0                 | 0    | 0    | 0                  | 0   | 0   | 0                   | 0   | 0   | 0                   | 0   | 0   | 1                  | 0    | 0    | 0                  | 0    | 0   | 0                 | 0   | 0   | 0   | 0            | 0   |
| polychaetes, unk           | 0                 | 0    | 0    | 54                | 17   | 68   | 0                  | 1   | 0   | 0                   | 1   | 2   | 0                   | 0   | 0   | 0                  | 0    | 0    | 0                  | 0    | 0   | 0                 | 0   | 0   | 1   | 0            | 0   |
| Riftia pachyptila          | 0                 | 0    | 0    | 0                 | 0    | 0    | 0                  | 0   | 0   | 0                   | 0   | 0   | 0                   | 0   | 0   | 0                  | 0    | 0    | 0                  | 0    | 0   | 2                 | 4   | 0   | 0   | 0            | 3   |
| Tevnia jerichonana         | 0                 | 0    | 0    | 0                 | 0    | 0    | 0                  | 0   | 0   | 0                   | 0   | 0   | 0                   | 0   | 0   | 51                 | 158  | 52   | 0                  | 119  | 3   | 0                 | 9   | 1   | 0   | 3            | 0   |
| vestimentiferans, small    | 263               | 646  | 1087 | 149               | 318  | 1087 | 3                  | 10  | 26  | 0                   | 34  | 14  | 0                   | 0   | 0   | 390                | 314  | 193  | 227                | 361  | 259 | 116               | 293 | 223 | 29  | 229          | 728 |
| amphipod                   | 0                 | 1    | 1    | 0                 | 1    | 4    | 28                 | 1   | 6   | 14                  | 58  | 35  | 2                   | 1   | 5   | 938                | 427  | 24   | 334                | 285  | 918 | 24                | 3   | 20  | 5   | 15           | 17  |
| Bythograea thermydron      | 2                 | 3    | 3    | 0                 | 1    | 0    | 4                  | 1   | 2   | 2                   | 1   | 1   | 0                   | 0   | 0   | 1                  | 4    | 0    | 2                  | 4    | 1   | 0                 | 0   | 0   | 0   | 0            | 0   |
| Dahlella caldariensis      | 0                 | 0    | 0    | 0                 | 0    | 0    | 0                  | 0   | 0   | 0                   | 0   | 0   | 0                   | 0   | 0   | 0                  | 0    | 0    | 15                 | 11   | 3   | 0                 | 0   | 0   | 0   | 4            | 0   |
| juv. shrimp                | 0                 | 0    | 0    | 0                 | 0    | 1    | 0                  | 0   | 0   | 0                   | 0   | 0   | 0                   | 0   | 0   | 0                  | 0    | 0    | 0                  | 0    | 0   | 0                 | 0   | 0   | 0   | 0            | 0   |
| unsegmented worm           | 0                 | 0    | 0    | 0                 | 0    | 1    | 0                  | 0   | 0   | 0                   | 1   | 1   | 0                   | 0   | 0   | 5                  | 28   | 1    | 4                  | 1    | 0   | 0                 | 0   | 0   | 0   | 3            | 1   |
| anemone                    | 0                 | 0    | 0    | 1                 | 0    | 0    | 0                  | 0   | 0   | 0                   | 0   | 0   | 0                   | 0   | 0   | 0                  | 0    | 0    | 0                  | 0    | 0   | 0                 | 0   | 0   | 0   | 0            | 0   |
| dandelion                  | 0                 | 1    | 0    | 0                 | 0    | 0    | 0                  | 0   | 0   | 0                   | 0   | 0   | 0                   | 0   | 0   | 0                  | 0    | 0    | 0                  | 0    | 0   | 0                 | 0   | 0   | 0   | 0            | 0   |
| kinorhynch                 | 0                 | 0    | 0    | 3                 | 0    | 0    | 0                  | 0   | 0   | 0                   | 0   | 0   | 0                   | 0   | 0   | 0                  | 0    | 0    | 0                  | 0    | 0   | 0                 | 0   | 0   | 0   | 0            | 0   |
| Abyssotherma pacifica      | 0                 | 0    | 0    | 0                 | 0    | 0    | 0                  | 0   | 0   | 0                   | 0   | 0   | 0                   | 0   | 0   | 0                  | 0    | 0    | 0                  | 0    | 0   | 0                 | 0   | 3   | 0   | 0            | 2   |
| Metafolliculina sp.        | 0                 | 0    | 0    | 0                 | 0    | 0    | 0                  | 0   | 0   | 0                   | 0   | 0   | 0                   | 0   | 0   | 0                  | 0    | 0    | 0                  | 0    | 0   | 0                 | 0   | 0   | 0   | 1            | 2   |
